# Supplementary material
Source: publisher figshare collection journal article supplement (https://future-science-group.figshare.com/ndownloader/files/27655194)
Supplement: Supplementary file 1 [file 27655194]

## Sheet: Sheet1
Supplementary Table 1. Differentially methylated probes between accelerated and decelerated aging of gastric cancer samples (top 100).
	logFC	AveExpr	t	P.Value	adj.P.Val	B	AA<0_AVG	AA>0_AVG	deltaBeta	CHR	MAPINFO	Strand	Type	gene	feature	cgi	feat.cgi	UCSC_CpG_Islands_Name	DHS	Enhancer	Phantom	Probe_SNPs	Probe_SNPs_10
cg03967192	0.343212	0.0926553	19.8753	1.89617e-58	8.2724e-54	121.833	0.0483366	0.391549	0.343212	2	10861604	F	I	ATP6V1C2	TSS200	island	TSS200-island	chr2:10861206-10862382	TRUE	TRUE
cg21076935	0.407699	0.106761	19.611	2.10115e-57	4.58335e-53	119.429	0.0541152	0.461814	0.407699	2	10861602	F	I	ATP6V1C2	TSS200	island	TSS200-island	chr2:10861206-10862382	TRUE	TRUE
cg23096553	0.315256	0.080176	19.4689	7.66253e-57	1.11431e-52	118.135	0.0394672	0.354723	0.315256	12	70759870	R	II	KCNMB4	TSS200	island	TSS200-island	chr12:70759437-70761052	NA	NA
cg23130076	0.368738	0.0791607	19.4199	1.19724e-56	1.3058e-52	117.689	0.0315459	0.400284	0.368738	12	70759920	R	I	KCNMB4	TSS200	island	TSS200-island	chr12:70759437-70761052	NA	NA
cg22834096	0.371123	0.097909	19.3423	2.42992e-56	2.1202e-52	116.982	0.0499862	0.421109	0.371123	2	10861593	F	I	ATP6V1C2	TSS200	island	TSS200-island	chr2:10861206-10862382	TRUE	TRUE
cg13719188	0.317904	0.0939586	19.2026	8.67888e-56	6.31056e-52	115.709	0.0529079	0.370812	0.317904	1	236445668	F	II	ERO1LB	TSS1500	island	TSS1500-island	chr1:236444603-236445700	NA	NA
cg27462418	0.352966	0.0797096	19.1376	1.5706e-55	8.70887e-52	115.116	0.0341314	0.387098	0.352966	7	149470809	R	I	ZNF467	TSS1500	island	TSS1500-island	chr7:149470114-149471054	NA	NA	high-CpG:149101463-149101789
cg23191118	0.281913	0.102665	19.1358	1.59697e-55	8.70887e-52	115.1	0.0662614	0.348174	0.281913	8	145560718	F	II	SCRT1	TSS1500	island	TSS1500-island	chr8:145555342-145562310	NA	NA	high-CpG:145531526-145531543
cg26843430	0.304436	0.0675667	19.0476	3.56978e-55	1.66919e-51	114.296	0.0282552	0.332691	0.304436	12	70759914	R	I	KCNMB4	TSS200	island	TSS200-island	chr12:70759437-70761052	NA	NA
cg09537107	0.396575	0.0788207	19.04	3.82605e-55	1.66919e-51	114.226	0.0276114	0.424186	0.396575	19	48897008	F	I	GRIN2D	TSS1500	island	TSS1500-island	chr19:48896890-48897199	TRUE	TRUE
cg16675644	0.351928	0.0702186	18.6464	1.38884e-53	5.50826e-50	110.636	0.0247745	0.376702	0.351928	19	48897005	F	I	GRIN2D	TSS1500	island	TSS1500-island	chr19:48896890-48897199	TRUE	TRUE
cg11274233	0.238066	0.0573405	18.5819	2.50408e-53	9.10379e-50	110.047	0.0265993	0.264665	0.238066	2	10861710	R	I	ATP6V1C2	TSS200	island	TSS200-island	chr2:10861206-10862382	TRUE	TRUE
cg15504677	0.333376	0.0728465	18.4422	8.96243e-53	3.00772e-49	108.773	0.0297979	0.363174	0.333376	19	49521513	F	I	LHB	TSS1500	island	TSS1500-island	chr19:49521087-49522241	NA	NA
cg11644057	0.295326	0.0847538	18.3867	1.48813e-52	4.63732e-49	108.266	0.0466186	0.341944	0.295326	19	409408	F	II	C2CD4C	TSS1500	island	TSS1500-island	chr19:407011-409511	NA	NA
cg22208012	0.332286	0.0790315	18.3501	2.07827e-52	6.04457e-49	107.932	0.0361238	0.368409	0.332286	17	1954175	F	I	MIR212	TSS1500	island	TSS1500-island	chr17:1952919-1962328	NA	NA
cg01783706	0.234549	0.0625916	18.2608	4.70078e-52	1.2197e-48	107.116	0.0323045	0.266853	0.234549	12	49739991	R	I	DNAJC22	TSS1500	island	TSS1500-island	chr12:49738680-49740841	NA	NA
cg11503720	0.347143	0.0739508	18.2596	4.75277e-52	1.2197e-48	107.105	0.0291245	0.376267	0.347143	1	166944856	F	I	ILDR2	TSS1500	island	TSS1500-island	chr1:166944674-166945169	TRUE	NA	high-CpG:165211228-165211675
cg10819771	0.329283	0.0826769	18.1529	1.25975e-51	3.05329e-48	106.131	0.0401569	0.36944	0.329283	7	149470335	R	I	ZNF467	TSS200	island	TSS200-island	chr7:149470114-149471054	NA	NA
cg10385411	0.335401	0.0661835	18.1029	1.98765e-51	4.56396e-48	105.676	0.0228734	0.358274	0.335401	19	48897143	R	I	GRIN2D	TSS1500	island	TSS1500-island	chr19:48896890-48897199	TRUE	NA
cg04580029	0.370299	0.088948	18.0744	2.57826e-51	5.62409e-48	105.416	0.0411317	0.41143	0.370299	16	3013885	F	I	KREMEN2	TSS1500	island	TSS1500-island	chr16:3013651-3015131	NA	TRUE
cg16803141	0.317579	0.0674808	18.0434	3.42233e-51	7.10981e-48	105.133	0.0264721	0.344051	0.317579	7	149470343	R	I	ZNF467	TSS200	island	TSS200-island	chr7:149470114-149471054	NA	NA
cg19721115	0.376099	0.0884643	18.0077	4.74338e-51	9.40634e-48	104.806	0.039899	0.415998	0.376099	12	70759665	F	I	KCNMB4	TSS1500	island	TSS1500-island	chr12:70759437-70761052	NA	NA
cg27220968	0.295401	0.079097	17.9958	5.28889e-51	1.00321e-47	104.698	0.0409521	0.336353	0.295401	7	100493724	F	II	ACHE	TSS200	island	TSS200-island	chr7:100492217-100494941	NA	NA
cg00969047	0.290397	0.0607462	17.9669	6.88387e-51	1.25134e-47	104.434	0.0232476	0.313644	0.290397	12	57610347	F	I	NXPH4	TSS1500	island	TSS1500-island	chr12:57609976-57611168	NA	TRUE
cg02539714	0.276371	0.0695465	17.9537	7.76786e-51	1.35555e-47	104.314	0.033859	0.31023	0.276371	12	122231866	F	II	RHOF	TSS1500	island	TSS1500-island	chr12:122230903-122232359	NA	NA
cg05149234	0.276101	0.0557568	17.9124	1.13246e-50	1.90023e-47	103.937	0.0201041	0.296205	0.276101	11	66024911	F	I	KLC2	TSS200	island	TSS200-island	chr11:66024910-66026253	NA	NA	high-CpG:65781322-65781885	rs12807802
cg10392164	0.288121	0.103465	17.8894	1.39804e-50	2.1952e-47	103.726	0.0662603	0.354381	0.288121	11	65548886	R	II	DKFZp761E198	TSS1500	island	TSS1500-island	chr11:65547499-65549261	NA	NA
cg10864955	0.307589	0.0666138	17.8885	1.40889e-50	2.1952e-47	103.719	0.0268952	0.334484	0.307589	20	43374390	F	I	KCNK15	TSS200	island	TSS200-island	chr20:43374349-43374890	NA	NA
cg25033139	0.344785	0.0763021	17.8769	1.56639e-50	2.35645e-47	103.613	0.0317803	0.376565	0.344785	11	119020122	R	I	ABCG4	TSS200	island	TSS200-island	chr11:119019643-119020887	TRUE	NA
cg16016176	0.345249	0.0717535	17.8715	1.64635e-50	2.39417e-47	103.563	0.0271717	0.372421	0.345249	3	119298513	R	I	ADPRH	TSS200	island	TSS200-island	chr3:119298284-119298983	NA	TRUE	high-CpG:120781045-120781299
cg22676763	0.276361	0.0664441	17.8487	2.0272e-50	2.85293e-47	103.355	0.0307579	0.307119	0.276361	19	8273917	R	I	LASS4	TSS1500	island	TSS1500-island	chr19:8273530-8273920	NA	NA
cg24980893	0.321588	0.0679084	17.8318	2.3647e-50	3.2239e-47	103.201	0.0263821	0.34797	0.321588	7	116164709	R	I	CAV1	TSS200	island	TSS200-island	chr7:116164703-116166735	TRUE	NA
cg06043042	0.242914	0.100086	17.8279	2.45075e-50	3.23997e-47	103.165	0.068719	0.311633	0.242914	10	71333202	R	II	NEUROG3	TSS200	island	TSS200-island	chr10:71331926-71333392	NA	NA
cg22411407	0.332852	0.0590129	17.7929	3.37455e-50	4.33005e-47	102.846	0.0160321	0.348884	0.332852	7	100081358	F	I	C7orf51	TSS200	island	TSS200-island	chr7:100080693-100081371	NA	NA
cg12777448	0.306053	0.0639835	17.7823	3.71729e-50	4.63355e-47	102.749	0.0244631	0.330516	0.306053	14	58618986	R	I	C14orf37	TSS200	island	TSS200-island	chr14:58618291-58619220	TRUE	NA
cg15144236	0.357913	0.0707556	17.7743	3.99894e-50	4.84616e-47	102.676	0.0245386	0.382451	0.357913	6	144385792	F	I	PLAGL1	TSS200	island	TSS200-island	chr6:144384894-144385888	TRUE	NA	high-CpG:144427387-144427530
cg02341038	0.355749	0.0734673	17.7703	4.14782e-50	4.89072e-47	102.64	0.0275297	0.383279	0.355749	11	119020138	R	I	ABCG4	TSS200	island	TSS200-island	chr11:119019643-119020887	TRUE	NA
cg01925962	0.300668	0.0622709	17.7378	5.57914e-50	6.40529e-47	102.343	0.0234459	0.324114	0.300668	2	27193339	F	I	MAPRE3	TSS200	island	TSS200-island	chr2:27193273-27193864	NA	NA
cg21851151	0.289029	0.0721255	17.685	9.03996e-50	1.01125e-46	101.861	0.0348034	0.323833	0.289029	14	69951422	F	I	FLJ44817	TSS200	island	TSS200-island	chr14:69950459-69951916	TRUE	TRUE	high-CpG:69021149-69021197
cg14974711	0.334109	0.119237	17.6754	9.86629e-50	1.07609e-46	101.774	0.0760938	0.410202	0.334109	16	3096477	R	II	MMP25	TSS1500	island	TSS1500-island	chr16:3095600-3097033	NA	TRUE
cg09203114	0.295996	0.064958	17.6362	1.41063e-49	1.50102e-46	101.417	0.0267362	0.322733	0.295996	20	43374406	F	I	KCNK15	TSS200	island	TSS200-island	chr20:43374349-43374890	NA	NA
cg09866690	0.327126	0.0636408	17.6284	1.51571e-49	1.55026e-46	101.345	0.0213993	0.348526	0.327126	7	100081329	F	I	C7orf51	TSS1500	island	TSS1500-island	chr7:100080693-100081371	NA	NA
cg12343791	0.271876	0.0625988	17.6275	1.52798e-49	1.55026e-46	101.337	0.0274917	0.299367	0.271876	22	39240109	F	I	NPTXR	TSS200	island	TSS200-island	chr22:39239168-39240425	NA	NA		rs9607580
cg05346899	0.30977	0.0975676	17.6185	1.65887e-49	1.6448e-46	101.255	0.0575672	0.367337	0.30977	19	8273912	R	II	LASS4	TSS1500	island	TSS1500-island	chr19:8273530-8273920	NA	NA
cg17150306	0.312909	0.0685174	17.5996	1.97195e-49	1.91178e-46	101.082	0.0281117	0.341021	0.312909	7	855575	R	I	UNC84A	TSS1500	island	TSS1500-island	chr7:855308-856747	NA	NA
cg18052878	0.247654	0.0657276	17.5578	2.88608e-49	2.7372e-46	100.701	0.0337483	0.281402	0.247654	11	61276087	F	I	LRRC10B	TSS200	island	TSS200-island	chr11:61275825-61277329	NA	TRUE
cg21725265	0.230488	0.091403	17.5348	3.5628e-49	3.30711e-46	100.491	0.0616403	0.292128	0.230488	19	19051201	F	II	HOMER3	TSS200	island	TSS200-island	chr19:19051019-19051939	NA	NA
cg06892635	0.24432	0.0577982	17.5213	4.02762e-49	3.66069e-46	100.368	0.0262493	0.27057	0.24432	17	8649228	R	I	CCDC42	TSS1500	island	TSS1500-island	chr17:8649003-8649513	NA	NA
cg02571907	0.208567	0.098742	17.5164	4.21304e-49	3.75106e-46	100.323	0.07181	0.280377	0.208567	3	119298511	R	II	ADPRH	TSS200	island	TSS200-island	chr3:119298284-119298983	NA	TRUE	high-CpG:120781045-120781299
cg13565301	0.361131	0.0921366	17.491	5.31078e-49	4.56012e-46	100.092	0.0455041	0.406635	0.361131	17	26698730	F	I	SARM1	TSS1500	island	TSS1500-island	chr17:26698359-26699557	NA	NA	high-CpG:23722556-23723231
cg19431241	0.236692	0.11962	17.4906	5.33079e-49	4.56012e-46	100.088	0.0890566	0.325749	0.236692	20	43374350	R	II	KCNK15	TSS200	island	TSS200-island	chr20:43374349-43374890	NA	NA
cg12077344	0.336807	0.0837802	17.4789	5.93307e-49	4.97773e-46	99.9814	0.0402886	0.377095	0.336807	14	55033982	F	I	SAMD4A	TSS1500	island	TSS1500-island	chr14:55031826-55035030	NA	NA	high-CpG:54103588-54104389
cg26942943	0.410154	0.106002	17.473	6.26302e-49	5.15541e-46	99.9273	0.053039	0.463193	0.410154	16	3096634	F	I	MMP25	TSS200	island	TSS200-island	chr16:3095600-3097033	TRUE	TRUE
cg02440279	0.336739	0.0659273	17.4194	1.02166e-48	8.25405e-46	99.4384	0.0224445	0.359184	0.336739	17	61554400	R	I	ACE	TSS200	island	TSS200-island	chr17:61553834-61555063	NA	NA	high-CpG:58908099-58908219
cg14150327	0.298065	0.0664003	17.4145	1.06761e-48	8.46846e-46	99.3945	0.0279114	0.325977	0.298065	2	206547084	F	I	NRP2	TSS200	island	TSS200-island	chr2:206546603-206547566	TRUE	NA	high-CpG:206255063-206256062
cg08748615	0.32549	0.0682285	17.3812	1.44766e-48	1.12781e-45	99.0902	0.0261983	0.351688	0.32549	1	39957298	R	I	BMP8A	TSS200	island	TSS200-island	chr1:39956424-39958137	NA	NA	high-CpG:39729875-39730234
cg07161071	0.232814	0.0609096	17.3374	2.15902e-48	1.65248e-45	98.6909	0.0308466	0.26366	0.232814	7	128578164	F	I	IRF5	TSS200	island	TSS200-island	chr7:128577818-128578756	NA	TRUE		rs6953165
cg09801082	0.327813	0.0685105	17.3322	2.2632e-48	1.70235e-45	98.6438	0.0261803	0.353993	0.327813	17	7452289	F	I	TNFSF12	TSS200	island	TSS200-island	chr17:7452150-7452645	TRUE	TRUE
cg15315096	0.297433	0.0678321	17.3292	2.32529e-48	1.71941e-45	98.6167	0.0294248	0.326858	0.297433	2	27193331	F	I	MAPRE3	TSS200	island	TSS200-island	chr2:27193273-27193864	NA	NA
cg11593482	0.367356	0.0795547	17.3222	2.47963e-48	1.80298e-45	98.5525	0.0321183	0.399474	0.367356	3	119298420	R	I	ADPRH	TSS200	island	TSS200-island	chr3:119298284-119298983	NA	TRUE	high-CpG:120781045-120781299
cg01997696	0.388217	0.146845	17.3193	2.54703e-48	1.82163e-45	98.5257	0.0967152	0.484933	0.388217	20	43374401	R	I	KCNK15	TSS200	island	TSS200-island	chr20:43374349-43374890	NA	NA
cg11377484	0.284257	0.116058	17.3146	2.6567e-48	1.86942e-45	98.4836	0.0793521	0.363609	0.284257	7	128578176	F	II	IRF5	TSS200	island	TSS200-island	chr7:128577818-128578756	NA	TRUE		rs6953165
cg18533883	0.400622	0.104301	17.2887	3.36513e-48	2.33033e-45	98.2475	0.052569	0.453191	0.400622	1	11919464	F	I	NPPB	TSS1500	island	TSS1500-island	chr1:11919115-11919555	NA	NA
cg22715021	0.379576	0.103787	17.2189	6.36147e-48	4.3333e-45	97.6113	0.0547728	0.434349	0.379576	6	35744355	F	I	C6orf126	TSS200	island	TSS200-island	chr6:35744225-35744562	TRUE	NA
cg09518742	0.361501	0.0809024	17.2173	6.4562e-48	4.3333e-45	97.5965	0.0342221	0.395723	0.361501	11	119020115	R	I	ABCG4	TSS200	island	TSS200-island	chr11:119019643-119020887	TRUE	NA
cg17587023	0.298514	0.0817982	17.205	7.2252e-48	4.77597e-45	97.4841	0.0432514	0.341765	0.298514	1	206223592	F	I	AVPR1B	TSS1500	island	TSS1500-island	chr1:206223537-206224028	TRUE	TRUE
cg01506130	0.254153	0.0674838	17.2004	7.53254e-48	4.90481e-45	97.4425	0.0346652	0.288819	0.254153	19	409357	R	II	C2CD4C	TSS200	island	TSS200-island	chr19:407011-409511	NA	NA
cg19844581	0.329041	0.0718456	17.1818	8.92456e-48	5.72576e-45	97.2731	0.0293569	0.358398	0.329041	11	119020147	R	I	ABCG4	TSS200	island	TSS200-island	chr11:119019643-119020887	TRUE	NA
cg14286439	0.347514	0.0858438	17.1784	9.20414e-48	5.81955e-45	97.2423	0.0409697	0.388484	0.347514	22	43116946	F	I	A4GALT	TSS200	island	TSS200-island	chr22:43116151-43117121	TRUE	NA	high-CpG:41446597-41447245	rs28910286
cg05952120	0.287847	0.0692177	17.1588	1.10134e-47	6.86405e-45	97.063	0.0320483	0.319895	0.287847	17	61554416	R	I	ACE	TSS200	island	TSS200-island	chr17:61553834-61555063	NA	NA	high-CpG:58908099-58908219
cg19530551	0.359858	0.0839099	17.1156	1.63212e-47	1.00288e-44	96.67	0.0374417	0.3973	0.359858	19	19051190	F	I	HOMER3	TSS200	island	TSS200-island	chr19:19051019-19051939	NA	NA
cg19932227	0.346632	0.0815751	17.0946	1.9783e-47	1.19066e-44	96.4779	0.0368148	0.383447	0.346632	3	119298432	R	I	ADPRH	TSS200	island	TSS200-island	chr3:119298284-119298983	NA	TRUE	high-CpG:120781045-120781299
cg07647353	0.303915	0.0753661	17.0938	1.9923e-47	1.19066e-44	96.4708	0.0361217	0.340037	0.303915	10	71333186	R	I	NEUROG3	TSS200	island	TSS200-island	chr10:71331926-71333392	NA	NA
cg06636316	0.295021	0.0676189	17.0922	2.02153e-47	1.1918e-44	96.4563	0.0295231	0.324544	0.295021	19	30303495	R	I	CCNE1	TSS200	island	TSS200-island	chr19:30302856-30303681	NA	NA
cg16705665	0.311478	0.0724682	17.0792	2.2761e-47	1.32399e-44	96.3378	0.0322472	0.343726	0.311478	11	63684331	F	I	RCOR2	TSS200	island	TSS200-island	chr11:63683743-63684628	NA	NA
cg27237189	0.238868	0.0991538	17.069	2.49683e-47	1.43328e-44	96.2453	0.068309	0.307177	0.238868	10	21815683	R	II	C10orf140	TSS1500	island	TSS1500-island	chr10:21814786-21815716	TRUE	NA
cg05702851	0.308477	0.0621682	17.0553	2.82849e-47	1.60258e-44	96.1207	0.0223348	0.330812	0.308477	4	110481083	F	I	CCDC109B	TSS1500	island	TSS1500-island	chr4:110480827-110482060	NA	NA
cg08798295	0.288338	0.113829	17.0524	2.90565e-47	1.62519e-44	96.0938	0.0765966	0.364935	0.288338	7	98972169	R	II	ARPC1B	TSS200	island	TSS200-island	chr7:98971649-98973170	NA	NA	high-CpG:98809780-98810318
cg15947940	0.357231	0.0696907	17.0492	2.99178e-47	1.65218e-44	96.0647	0.0235617	0.380793	0.357231	1	39957129	F	I	BMP8A	TSS200	island	TSS200-island	chr1:39956424-39958137	NA	NA		rs7533743
cg04547554	0.336645	0.0683556	17.0334	3.45502e-47	1.88415e-44	95.9209	0.0248848	0.36153	0.336645	19	41860013	F	I	TGFB1	TSS200	island	TSS200-island	chr19:41858527-41860100	NA	NA		rs17516265
cg10209752	0.257373	0.0662291	17.0311	3.52732e-47	1.89983e-44	95.9002	0.0329948	0.290367	0.257373	14	58619003	R	I	C14orf37	TSS200	island	TSS200-island	chr14:58618291-58619220	TRUE	NA
cg13240385	0.245301	0.16714	17.0276	3.64394e-47	1.93871e-44	95.8677	0.135464	0.380765	0.245301	12	54982590	F	II	PPP1R1A	TSS200	island	TSS200-island	chr12:54981933-54982591	TRUE	NA
cg19354750	0.322133	0.0727661	17.0174	3.99801e-47	2.10146e-44	95.775	0.0311693	0.353302	0.322133	17	61554413	R	I	ACE	TSS200	island	TSS200-island	chr17:61553834-61555063	NA	NA	high-CpG:58908099-58908219
cg09232440	0.316483	0.0832934	16.9988	4.73594e-47	2.4597e-44	95.6058	0.0424262	0.358909	0.316483	1	39956722	R	I	BMP8A	TSS1500	island	TSS1500-island	chr1:39956424-39958137	NA	NA
cg00041759	0.27321	0.0544508	16.9471	7.58458e-47	3.89285e-44	95.1354	0.0191714	0.292381	0.27321	11	66024941	F	I	KLC2	TSS200	island	TSS200-island	chr11:66024910-66026253	NA	NA	high-CpG:65781322-65781885	rs12807802
cg27567593	0.290225	0.151789	16.9239	9.37458e-47	4.75564e-44	94.9237	0.114312	0.404537	0.290225	1	39956653	R	I	BMP8A	TSS1500	island	TSS1500-island	chr1:39956424-39958137	NA	NA
cg16506703	0.308802	0.0723877	16.9143	1.02337e-46	5.13178e-44	94.8362	0.0325124	0.341314	0.308802	16	75529356	R	I	CHST6	TSS1500	island	TSS1500-island	chr16:75528624-75529437	TRUE	NA
cg17731261	0.247466	0.0768772	16.9122	1.04324e-46	5.17196e-44	94.8169	0.0449221	0.292388	0.247466	7	100493811	F	II	ACHE	TSS1500	island	TSS1500-island	chr7:100492217-100494941	NA	NA
cg16349656	0.267896	0.127288	16.8965	1.20344e-46	5.89917e-44	94.6742	0.0926945	0.360591	0.267896	7	150676364	F	II	KCNH2	TSS1500	island	TSS1500-island	chr7:150676178-150676585	NA	NA
cg11980147	0.263267	0.0563661	16.8952	1.21814e-46	5.90487e-44	94.6621	0.0223707	0.285637	0.263267	11	43702080	R	I	HSD17B12	TSS200	island	TSS200-island	chr11:43702016-43702597	NA	NA
cg25694349	0.364871	0.0792721	16.8844	1.34393e-46	6.44302e-44	94.564	0.0321566	0.397028	0.364871	12	133065906	F	I	FBRSL1	TSS1500	island	TSS1500-island	chr12:133065843-133066393	NA	NA
cg04923576	0.326752	0.0818577	16.8763	1.44693e-46	6.86146e-44	94.4902	0.0396645	0.366416	0.326752	1	39956807	R	I	BMP8A	TSS1500	island	TSS1500-island	chr1:39956424-39958137	NA	NA
cg15444978	0.27613	0.100052	16.8625	1.64083e-46	7.69513e-44	94.3646	0.0643959	0.340526	0.27613	14	103851370	F	II	MARK3	TSS1500	island	TSS1500-island	chr14:103851217-103852708	NA	NA		rs3759580
cg00186141	0.25445	0.0798949	16.8613	1.65801e-46	7.69513e-44	94.3542	0.0470379	0.301488	0.25445	7	131241768	F	II	PODXL	TSS1500	island	TSS1500-island	chr7:131240513-131241847	NA	NA
cg23345097	0.360018	0.0878192	16.8445	1.93217e-46	8.87315e-44	94.2013	0.0413303	0.401349	0.360018	3	119298355	F	I	ADPRH	TSS200	island	TSS200-island	chr3:119298284-119298983	NA	TRUE	high-CpG:120781045-120781299
cg00533586	0.251095	0.0938453	16.8327	2.15168e-46	9.77827e-44	94.0938	0.0614217	0.312516	0.251095	19	409510	F	II	C2CD4C	TSS1500	island	TSS1500-island	chr19:407011-409511	NA	NA
cg05637188	0.274019	0.0595622	16.8121	2.59517e-46	1.16721e-43	93.9066	0.0241783	0.298198	0.274019	19	41860004	F	I	TGFB1	TSS200	island	TSS200-island	chr19:41858527-41860100	NA	NA		rs17516265
cg22731064	0.244541	0.0803081	16.8105	2.63337e-46	1.17231e-43	93.892	0.0487307	0.293272	0.244541	15	78423943	R	I	CIB2	TSS200	island	TSS200-island	chr15:78423593-78424096	NA	NA	high-CpG:76210662-76211023
cg26795730	0.353154	0.10786	16.8044	2.78393e-46	1.22681e-43	93.8365	0.0622576	0.415412	0.353154	1	206223719	R	I	AVPR1B	TSS1500	island	TSS1500-island	chr1:206223537-206224028	TRUE	TRUE
cg26860182	0.317213	0.0689877	16.7969	2.98157e-46	1.30077e-43	93.768	0.0280262	0.34524	0.317213	12	133066054	R	I	FBRSL1	TSS1500	island	TSS1500-island	chr12:133065843-133066393	NA	NA
